# Supplementary material for: Embedding plasmonic nanoparticles in soft crystals: an approach exploiting CTAB–I structures
Source: Royal Society of Chemistry journal article supplement (doi:10.1039/d4na00008k), 2024-01-01
Supplement: d4na00008k1.pdf [file d4na00008k1.pdf]

## Electronic Supplementary Information

### Embedding Plasmonic Nanoparticles in Soft Crystals: An Approach Exploiting CTAB-I Structures Exploiting CTAB-I Structures

Navyashree Vasudeva<sup>a</sup>, Annie Jayasing<sup>a</sup>, Kishorkumar Sindogi<sup>a</sup>, Isha Yadav<sup>a</sup>, TN. Guru Row<sup>a</sup>, Sheetal K. Jain<sup>a</sup>, and Anshu Pandey<sup>a\*</sup>

<sup>a</sup>Solid State and Structural Chemistry Unit  
Indian Institute of Science  
C V Raman Road, Bengaluru-560012

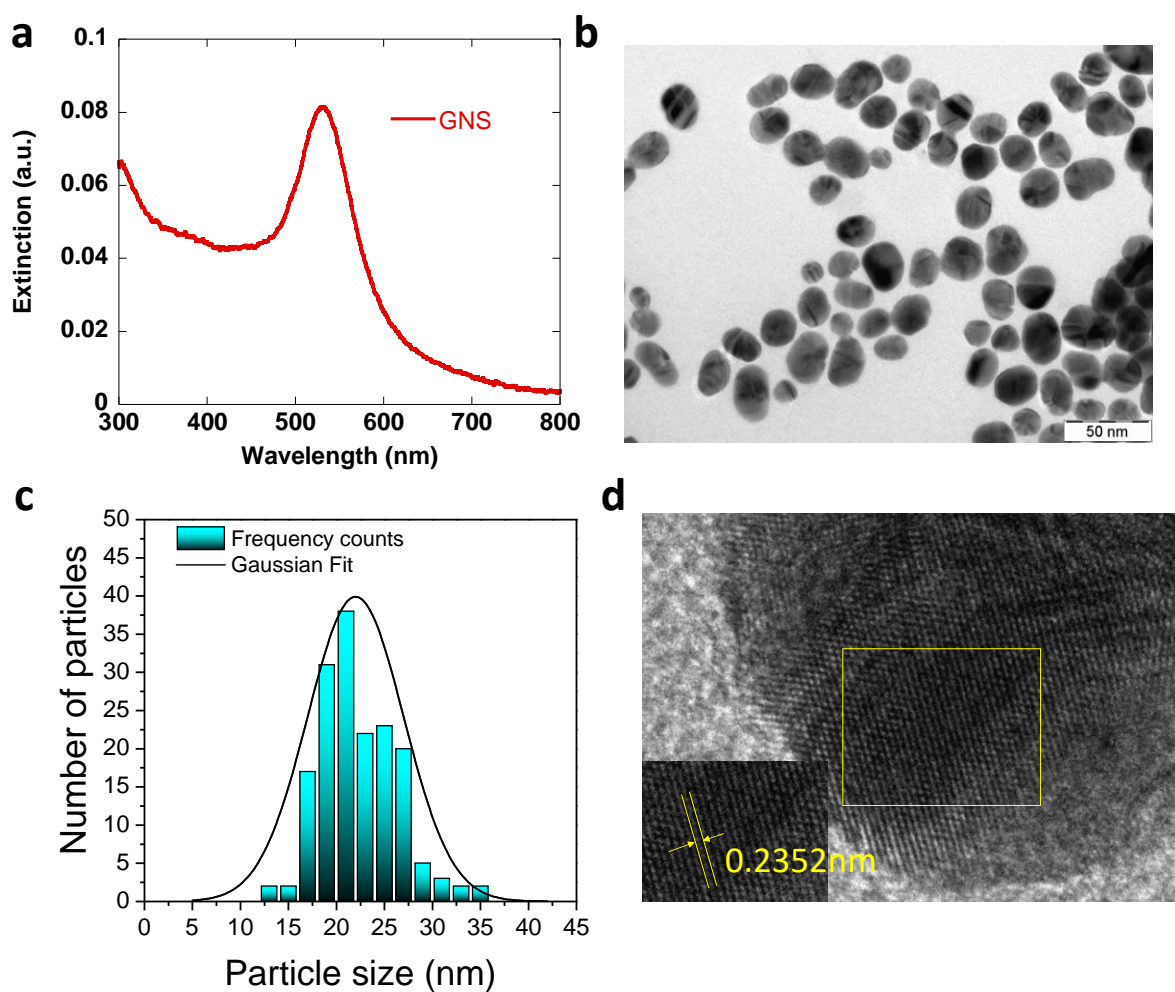

**Fig S1.** **a)** Extinction spectrum of the GNS used. **b)** TEM image of GNS. **c)** Histogram profile of GNS size distribution. **d)** HRTEM image of the GNS with lattice spacing marked.

**a.**

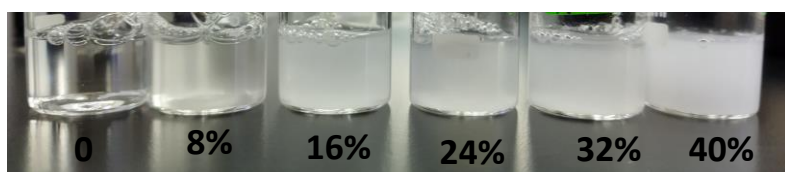

↓ 40 °C

**b.**

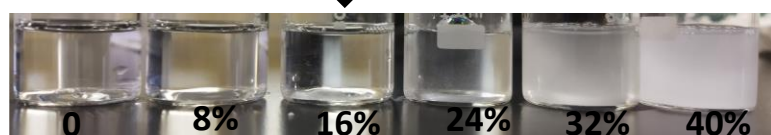

**Fig S2.** Photographs of KI added CTAB solutions with varying KI concentrations (0-40% VKI/VCTAB) **a)** at room temperature **b)** at 40 °C

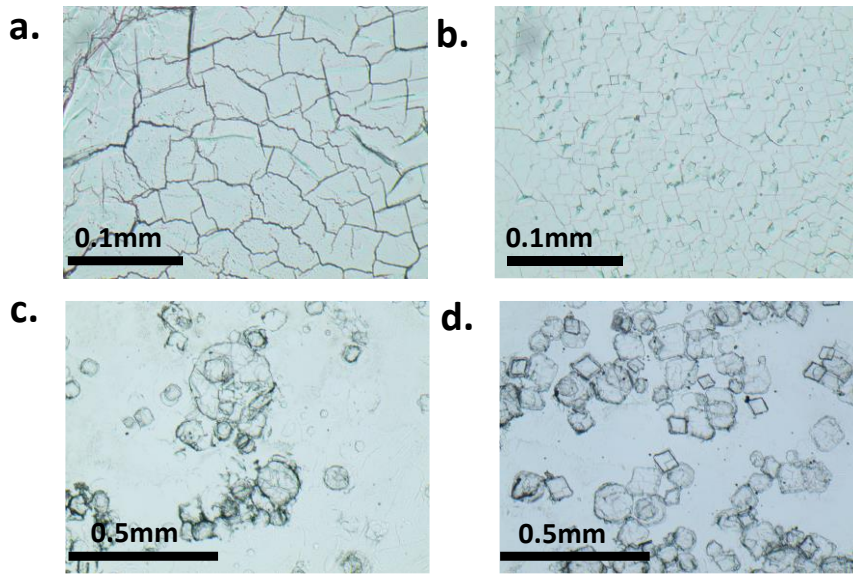

**Fig S3.** Optical microscope images depicting the formation of sheets with increasing amounts of KI, **(a)**16% **(b)**24% **(c)** 32% **(d)** 40%.

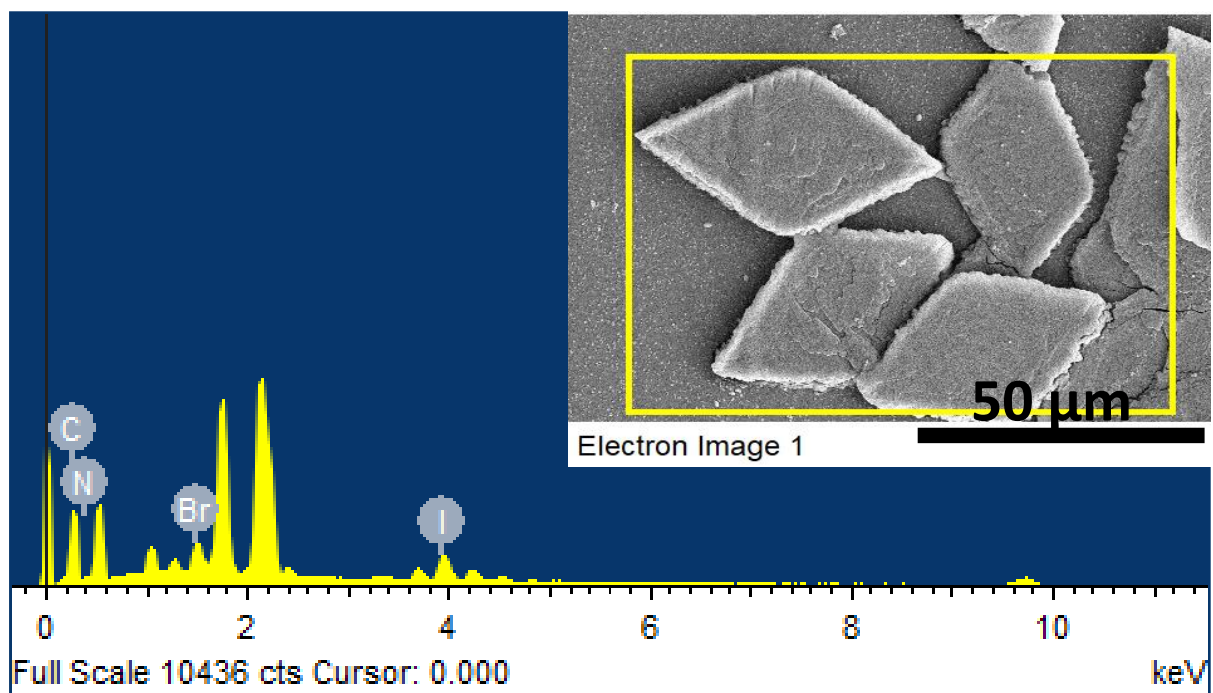

Fig S4. EDS spectrum of CTAB-I sheets

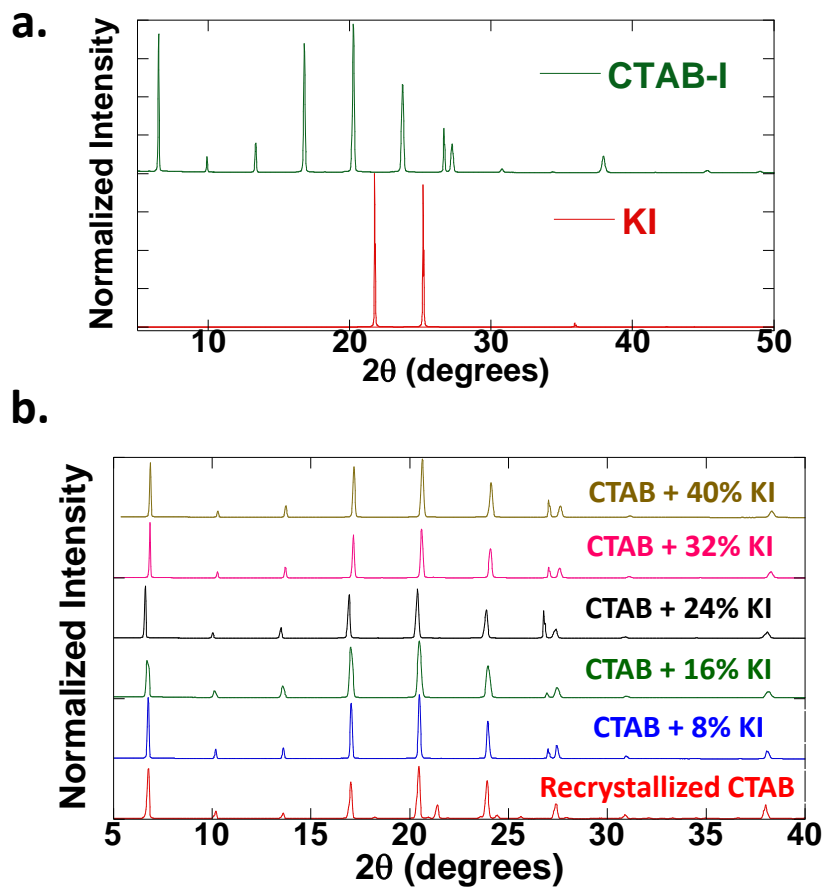

**Fig S5.** a) Comparison of PXRd pattern of as obtained CTAB-I with standard KI. b) PXRd patterns of different CTAB-I mixtures with varying amounts of KI.

**Table S1.** List of polymorphs of CTAB with unit cell parameters reported in the literature.

| Formula                                                        | CCDC number | Space group | a (Å) | b(Å)  | c (Å)  | $\alpha$ (°) | $\beta$ (°) | $\gamma$ (°) | V (Å <sup>3</sup> ) | Reference |
|----------------------------------------------------------------|-------------|-------------|-------|-------|--------|--------------|-------------|--------------|---------------------|-----------|
| C <sub>19</sub> H <sub>42</sub> N <sub>1</sub> Br <sub>1</sub> | 1122962     | P21/c       | 5.638 | 7.26  | 52.072 | 90           | 93.78       | 90           | 2126.768            | 35        |
| C <sub>19</sub> H <sub>42</sub> N <sub>1</sub> Br <sub>1</sub> | 1122963     | P21/c       | 5.66  | 7.26  | 51.9   | 90           | 93.8        | 90           | 2127.965            | 33        |
| C <sub>19</sub> H <sub>42</sub> N <sub>1</sub> Br <sub>1</sub> | 1941222     | P21/c       | 5.633 | 7.261 | 52.036 | 90           | 93.75       | 90           | 2123.701            | 37        |

**Table S2.** Unit cell parameters of polymorphs of CTAI, reported in the literature.

| Formula                                                          | CCDC number | Space group | a (Å) | b(Å)   | c (Å)  | $\alpha$ (°) | $\beta$ (°) | $\gamma$ (°) | V (Å <sup>3</sup> ) | Reference |
|------------------------------------------------------------------|-------------|-------------|-------|--------|--------|--------------|-------------|--------------|---------------------|-----------|
| C <sub>19</sub> H <sub>42</sub> N <sub>1</sub> I <sub>5</sub>    | 766104      | P-1         | 9.55  | 9.763  | 32.682 | 90.58        | 90.26       | 91.49        | 3045.947            | 36        |
| C <sub>19</sub> H <sub>42</sub> N <sub>1</sub> I <sub>3</sub>    | 679105      | P-1         | 7.715 | 7.807  | 22.716 | 81.83        | 82.59       | 88.73        | 1342.81             | 36        |
| C <sub>19</sub> H <sub>42</sub> N <sub>1</sub> I <sub>1</sub>    | 766103      | P21/m       | 5.784 | 7.544  | 25.887 | 90           | 95.4        | 90           | 1124.604            | 36        |
| C <sub>38</sub> H <sub>82</sub> N <sub>2</sub> I <sub>10</sub> * | 699988      | P21/c       | 8.448 | 60.484 | 12.069 | 90           | 108.83      | 90           | 5836.938            | 34        |
| C <sub>38</sub> H <sub>82</sub> N <sub>2</sub> I <sub>6</sub> *  | 699988      | P-1         | 7.828 | 8.556  | 21.803 | 91.07        | 96.92       | 116.14       | 1297.185            | 34        |
| C <sub>38</sub> H <sub>82</sub> N <sub>2</sub> I <sub>2</sub> *  | 699988      | P-1         | 7.243 | 8.866  | 18.812 | 82.78        | 81.08       | 65.94        | 1087.056            | 34        |

\* Polyiodides

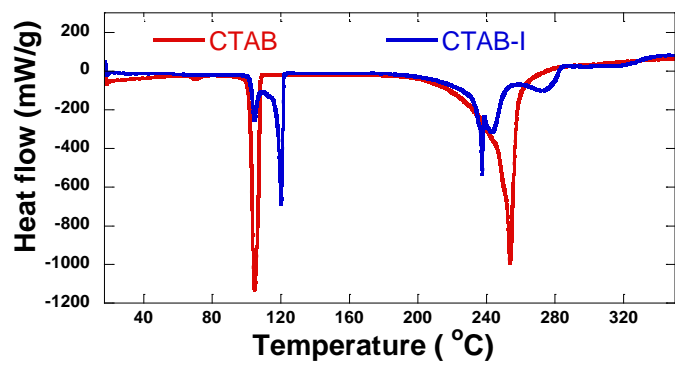

Fig S6. DTA curves of pure CTAB and CTAB-I phase.

**a.**

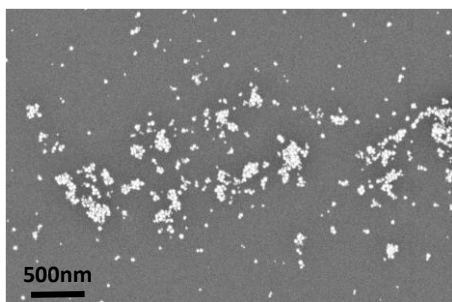

**b.**

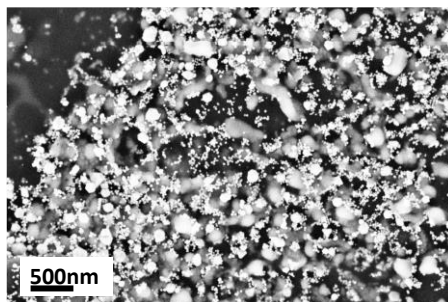

**Fig S7** SEM images of GNS depicting the effects of KI **a)** before **b)** after the addition of KI.
